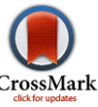

# The Neural Mechanisms Underlying the Acute Effect of Cigarette Smoking on Chronic Smokers

Kangcheng Wang<sup>1,2</sup>, Junyi Yang<sup>1,2</sup>, Songyan Zhang<sup>1,2</sup>, Dongtao Wei<sup>1,2</sup>, Xin Hao<sup>1,2</sup>, Shen Tu<sup>3</sup>, Jiang Qiu<sup>1,2\*</sup>

**1** Key Laboratory of Cognition and Personality (SWU), Ministry of Education, Chongqing, China, **2** School of Psychology, Southwest University, Chongqing, China, **3** Department of Psychology, Institute of Education, China West Normal University, Nanchong, Sichuan, China

## Abstract

Although previous research had related structural changes and impaired cognition to chronic cigarette smoking, recent neuroimaging studies have associated nicotine, which is a main chemical substance in cigarettes, with improvements in cognitive functions (e.g. improved attention performance). However, information about the alterations of whole-brain functional connectivity after acute cigarette smoking is limited. In this study, 22 smokers underwent resting-state functional magnetic resonance imaging (rs-fMRI) after abstaining from smoking for 12 hours (state of abstinence, SOA). Subsequently, the smokers were allowed to smoke two cigarettes (state of satisfaction, SOS) before they underwent a second rs-fMRI. Twenty non-smokers were also recruited to undergo rs-fMRI. In addition, high-resolution 3D T1-weighted images were acquired using the same magnetic resonance imaging (fMRI) scanner for all participants. The results showed that smokers had structural changes in insula, thalamus, medial frontal cortex and several regions of the default mode network (DMN) compared with non-smokers. Voxel-wise group comparisons of newly developed global brain connectivity (GBC) showed that smokers in the SOA condition had higher GBC in the insula and superior frontal gyrus compared with non-smokers. However, smokers in the SOS condition demonstrated significantly lower GBC in several regions of the DMN, as compared with smokers in the SOA condition. These results suggest that structural integrity combined with dysfunction of the DMN might be involved in relapses after a short period of time among smokers.

**Citation:** Wang K, Yang J, Zhang S, Wei D, Hao X, et al. (2014) The Neural Mechanisms Underlying the Acute Effect of Cigarette Smoking on Chronic Smokers. *PLoS ONE* 9(7): e102828. doi:10.1371/journal.pone.0102828

**Editor:** Satoru Hayasaka, Wake Forest School of Medicine, United States of America

**Received:** October 29, 2013; **Accepted:** June 24, 2014; **Published:** July 22, 2014

**Copyright:** © 2014 Wang et al. This is an open-access article distributed under the terms of the Creative Commons Attribution License, which permits unrestricted use, distribution, and reproduction in any medium, provided the original author and source are credited.

**Funding:** This research was supported by the National Natural Science Foundation of China (31070900;31271087), the Program for New Century Excellent Talents in University (2011) by the Ministry of Education, the Fundamental Research Funds for the Central Universities (SWU1209101), and the Key Discipline Fund of National 211 Project (TR201208-1). The funders had no role in study design, data collection and analysis, decision to publish, or preparation of the manuscript.

**Competing Interests:** The authors have declared that no competing interests exist.

\* Email: qiuji318@swu.edu.cn

## Introduction

Cigarette smoking is one of the leading causes of morbidity and mortality globally [1,2]. According to one report, approximately 4.9 million people died around the world in 2007 as a result of smoking [3]. A great interest of researchers is assessing the influence of chronic cigarette smoking on the human brain. Chronic cigarette smoking has been associated with structural changes in several key brain regions, including the medial frontal cortex [4], thalamus [5,6], insula [7], parietal cortex [8], anterior cingulate cortex, and middle cingulate cortex [9]. Consequently, smokers have several difficulties in completing cognitive tasks, such as working memory [10,11], delayed reward [12], and cognitive control tasks [13].

A growing body of evidence suggests that several regions of the brain display structural changes as a result of chronic cigarette smoking. Gons et al. (2011) used diffusion tensor imaging (DTI) to show that a history of cigarette smoking could be associated with the reduced microstructural integrity of white matter (WM) [14]. Compared with nonsmokers, chronic cigarette smokers have higher fractional anisotropy (FA) in the bilateral superior longitudinal fasciculus, which is a major WM pathway of fronto-parietal tracts [8]. Smokers also have higher FA in the prefrontal WM, cingulum cortex, and genu corpus callosum than nonsmokers

[15]. Other studies have found that smokers have smaller gray matter volumes (GMVs) in the thalamus, medial frontal cortex, cingulate cortex, and bilateral prefrontal cortex than non-smokers through voxel-based morphometry (VBM). The gray matter (GM) densities in the bilateral prefrontal cortex, orbitofrontal cortex, occipital lobe, and the temporal lobe were also found to decrease for smokers [4,5,16].

Aside from changes in the brain structures of smokers, the influence of nicotine on brain functions after acute smoking is also of interest. In an early functional magnetic resonance imaging (fMRI) study, Stein et al. (1998) found increased activation in the insula, frontal lobes, and amygdala after cumulative intravenous nicotine administration in cigarette smokers [17]. Another study used fMRI to investigate the acute effects of nicotine on smokers and reported an improvement in the performance of smokers at a visual attention task after nicotine administration due to increased activation in the insula, frontal gyrus, caudate, and thalamus [18]. Recently, several studies have examined the nicotine effect on large-scale brain networks. Hahn et al. (2007) used event-related fMRI to investigate the influence of nicotine on smokers' attention and found that nicotine induced deactivation in the default mode network (DMN) and improved attention performance in smokers [19]. Cole et al. (2010) investigated the effects of nicotine

replacement on abstinent smokers through resting-state fMRI (rs-fMRI); the therapeutic effect of nicotine replacement on cognitive withdrawal symptoms was associated with an enhanced inverse coupling between the executive control network and DMN [20]. Another study which used rs-fMRI also showed that smokers exhibited reduced connectivity in DMN regions and increased activity in the network related to attention after nicotine administration [21]. These results showed that nicotine was associated with decreased activity in DMN regions and increased activity in the regions related to executive control and attention.

Nicotine, which is a main chemical substance in cigarettes, can alter neural activity [19,21] by activating nicotinic cholinergic receptors [22]. However, information on the effects of acute cigarette smoking on neural circuits remains insufficient [22]. Increasing evidence has shown that distributed neural circuits in the brain exhibit spontaneous activity while people are at rest [23]. These slow frequency fluctuations in brain activity are temporally correlated within functionally related networks [24]. Such evidence provides an opportunity to investigate and characterize neural circuit abnormalities in smokers [25]. However, no study has investigated global functional connectivity patterns after acute cigarette smoking, although prior findings constitute important advances in our understanding of addiction to smoking. Such a global, data-driven approach is important to comprehensively examine the changes in global brain connectivity (GBC) after acute cigarette smoking. Thus, the present study applied a recently developed GBC method that could identify specific nodes or hubs influenced by smoking. Moreover, whether the regions influenced by acute cigarette smoking are related to structural change remains unknown. Although previous studies have used VBM based on the analysis of regions of interest (ROIs) to explore the changes caused by chronic cigarette smoking to some extent, this method excludes some key regions [5,8]. Therefore, a whole-brain analysis without an ROI-based hypothesis could be conducted to comprehensively investigate the structural brain changes in smokers and their relation to acute cigarette smoking.

To examine the effect of acute cigarette smoking on brain function and its relation to the regions that show structural changes, this study compared (1) the GBC of smokers when they abstained from smoking for 12 hours (state of abstinence, SOA) and after acute cigarette smoking (state of satisfaction, SOS) and (2) the GMV between smokers and non-smokers. On the basis of previous studies, we developed two a priori hypotheses. First, we hypothesized that smokers would display structural changes in prefrontal cortex and brain regions in DMN. Then, we hypothesized that the regional GBC of the DMN would be suppressed after acute cigarette smoking (i.e. in the SOS condition). Lastly, the regions of GBC changes caused by acute cigarette smoking would be associated with structural changes in chronic smokers, which would be expressed by increased or decreased GMV.

## Materials and Methods

### Participants

A total of 42 participants (22 male smokers and 20 male nonsmokers) aged 19 to 28 years-old were recruited through advertisements. All the participants recruited were undergraduates or graduates of Southwest University (Chongqing, China). After registration, potential participants were screened using semi-structured interview to assess their psychiatric condition, medication use, medical condition, history of substance use, history of claustrophobia, and the presence of metal implants in their body. Cigarette smokers who smoked at least eight cigarettes per day

without a period of abstinence longer than a week in the past year and met the DSM-IV criteria for nicotine dependence were considered suitable for this study. All the non-smokers in this study had no history of smoking in any case. All the participants were right-handed native Chinese speakers.

The following exclusion criteria for smokers and non-smokers were used: acute physical illness, claustrophobia, history of head injury with skull fracture, presence of metal dentures, history of alcohol or drug abuse or dependence, history of central nervous system diseases or conditions, history of medical conditions with significant effects on the central nervous system, history of mental illness, and family history of psychopathic disorders.

Participants were fully informed of the measurement methods and magnetic resonance imaging (MRI) scanning. All participants gave their written informed consent. The local ethics committee of Southwest University approved this consent procedure and the experimental procedure, which were both in accordance with the standards of the Declaration of Helsinki. All participants were given appropriate compensation after completing this study.

### Experimental design and image acquisition

All cigarette smokers were asked to avoid smoking for 12 hours before MRI scanning; this state was defined as the “state of abstinence” (SOA). To measure the extent of craving, each smoker was asked to fill in the 10-item Questionnaire of Smoking Urges (QSU-brief) [26,27] 10 mins before the first scanning. After scanning, the smokers were allowed to smoke two cigarettes; these smokers were in the “state of satisfaction” (SOS). The QSU-brief was again filled in by each smoker after the second scanning. Functional data of three of the smokers were removed because they had overly large head motions.

All MRI scans were obtained using a 3.0 T MRI scanner (Siemens, Erlangen, Germany). Participants were instructed to relax with their eyes closed, remain awake, lie still, and not to think of anything during rs-fMRI scanning. Participants were positioned carefully in the coil with a comfortable support and fitted with soft earplugs to limit the effects of noise on brain activity. After scanning, all participants were requested to confirm that they had not fallen asleep.

High-resolution T1-weighted anatomical images were acquired using a 3D magnetization-prepared rapid gradient-echo sequence in axial orientation (repetition time [TR] = 1900 ms; echo time [TE] = 2.52 ms; flip angle = 9°; field of view [FOV] = 256×256 mm<sup>2</sup>; matrix = 256×256; voxel size = 1×1×1 mm<sup>3</sup>).

T2-weighted fMRI images were acquired through a gradient-echo echo-planar pulse imaging sequence (TR = 2000 ms; TE = 30 ms; flip angle = 90°; number of slices = 32; slice thickness = 3.0 mm; slice gap = 1.0 mm; FOV = 220×220 mm<sup>2</sup>; matrix = 64×64; voxel size = 3.4×3.4×4 mm<sup>3</sup>). All images were aligned along the anterior commissure–posterior commissure (AC–PC) line. A total of 242 volumes were acquired for each participant.

### VBM analysis

VBM is an automatic procedure that can differentiate GMV. VBM was performed using SPM 8 software (Wellcome Department of Imaging Neuroscience, London) running on Matlab (version 7.10.0; Math-Works, Natick, MA, USA). All T1-weighted structural images were manually co-registered to the AC–PC line with the standard T1-weighted template provided by SPM 8 for better registration. The co-registered images from each participant were segmented into GM, WM, and cerebrospinal fluid (CSF) regions using the unified segmentation procedure. A diffeomorphic nonlinear registration algorithm named DARTEL (diffeomorphic anatomical registration through exponentiated lie

**Table 1.** Demographic and characteristic data of smoker and nonsmoker participants.

| Characteristics                    | Smokers (n = 22, male) | Nonsmokers (n = 20, male) | t    | p    |
|------------------------------------|------------------------|---------------------------|------|------|
| Age (Mean ± SD years)              | 22.48±2.48             | 21.80±1.32                | 1.08 | 0.29 |
| Education (Mean ± SD years)        | 15.14±1.83             | 15.20±1.19                | 0.13 | 0.90 |
| Cigarettes (per day)               | 11.90±6.13             | NA                        |      |      |
| Years of smoking (Mean ± SD years) | 4.95±2.27              | NA                        |      |      |
| Pack-years                         | 3.10±2.63              | NA                        |      |      |
| QSU (SOA)*                         | 44.42±10.61            | NA                        |      |      |
| QSU (SOS)*                         | 32.32±10.24            | NA                        |      |      |

\* The number of participants for smoker's QSU scores was 19. The data of three smokers were removed as they were not included in further GBC analysis. Abbreviation: QSU, Questionnaire of Smoking Urges; SOA, State of Abstinence; SOS, State of Satisfaction. doi:10.1371/journal.pone.0102828.t001

algebra), was used to conduct a special normalization that involved the following steps. First, a specific template was computed using the average tissue probability maps from all the participants, and each participant's maps were warped into the specific template. This procedure was repeated until the best study-specific template was generated to improve the alignment and achieve a more accurate inter-participant registration. Second, further modulation was conducted to preserve the volume of GM/WM. This step involves multiplying the spatially normalized GM/WM by its relative volume [28]. Inference was made on the measures of volume rather than tissue concentration (density) when using modulated images for performing subsequent group comparisons. Finally, a 10 mm full-width at half-maximum (FWHM) Gaussian kernel [29,30] was applied to smooth the modulated GM/WM images.

Based on the general linear model, voxel-based comparisons of GMV were performed between groups of smokers and nonsmokers using two-sample *t*-test. Age, education, and the whole brain volume (GMV and WM volume) were used as covariates to control for possible confounding variables in the whole-brain analysis. The significance of group differences was set at a 0.05 significance level (with a combined height threshold of  $p < 0.001$  and a minimum cluster size of 41 voxels) using the AlphaSim criterion as the threshold to correct for multiple comparisons. In addition, we investigated the relationship between changed regions and smoking history. We performed an exploratory correlation analysis between the GMV of changed regions and the smoking history of each smoker. First, we created five ROI volumes based on a threshold (at  $p = 0.05$ , AlphaSim corrected) significant peak of GMV to compare smokers and nonsmokers. We then extracted the GMV of each ROI for each smoker and correlated this value with years of smoking.

### GBC analysis

Pre-processing of all functional images was conducted using SPM 8. First, 10 volumes were removed to ensure steady-state longitudinal magnetization before slice timing and realignment were conducted. Data from three smokers and one nonsmoker were excluded because their translation or rotation exceeded  $\pm 2.0$  mm or  $\pm 2.0^\circ$ . Second, the realigned images were spatially normalized using an echo-planar imaging template and resampled into 3 mm cubic voxels. Third, a 6 mm FWHM Gaussian blur was used to smooth each 3D volume and decrease the spatial frequency noise. Finally, band-pass filtering from 0.01 Hz to 0.08 Hz was conducted, and several sources of nuisance covariates were regressed, namely, six head motion parameters, the global mean signal, the WM signal, and CSF.

GBC was calculated as previously described [31–34]. The connectivity between each voxel in the whole brain was estimated. The time course of each voxel from each participant was correlated with every other voxel. Thus, a matrix of Pearson's correlation coefficients was obtained. Subsequently, the number of voxel connections for each voxel was counted with a threshold of  $r > 0.25$  to compute the GBC map [31]. The vertex degree was calculated as the number of adjacent links using an undirected and weighted adjacency matrix. The map was finally transformed to Fisher *Z* values, so that maps across participants could be averaged and compared.

One-sample *t*-tests were performed for nonsmokers, smokers in the SOA condition, and smokers in the SOS condition to identify voxels with significantly higher connectivity. Significance threshold was set to  $p < 0.01$  (with a combined height threshold of  $p < 0.01$  and a minimum cluster size of 40 voxels) using the AlphaSim criterion.

A two-sample *t*-test was also performed to compare the *Z* value maps of SOA smokers and nonsmokers for identifying the GBC of smokers in the SOA condition. To determine GBC changes after acute cigarette smoking, a paired *t*-test was performed to compare the *Z* value maps of smokers in the SOA and SOS conditions. Moreover, a two-sample *t*-test was conducted to compare smokers in the SOS condition and nonsmokers to further investigate the influence of acute cigarette smoking. The *t*-map was set to a threshold of  $p < 0.01$  using the AlphaSim correction. Group comparisons were restricted to voxels with significant comparison maps of smokers or nonsmokers using an explicit mask from the union set of the one-sample *t*-test results.

## Results

### Participants

The participants' demographic and characteristic data are shown in Table 1. The smokers were matched with the nonsmokers by age (*T*-score = 1.08,  $p > 0.05$ ) and years of education (*T*-score = 0.13,  $p > 0.05$ ). The smokers had an average of 4.95 years of smoking and consumed an average of 11.90 cigarettes per day (Table 1). The mean (SD) score of pack-years [35] was  $3.10 \pm 2.63$ . The mean (SD) craving scores, which were measured by the QSU-brief for smokers in the SOA and SOS conditions, were  $44.42 \pm 10.61$  and  $32.32 \pm 10.24$  respectively. The smokers indicated lower craving levels under the SOS condition (*T*-score = 3.61,  $p = 0.002$ ).

**Table 2.** Differences in gray matter volumes between smokers and nonsmokers.

| Comparisons          | R/L | Number of Voxels in Cluster | MNI coordinate |     |    | T score |
|----------------------|-----|-----------------------------|----------------|-----|----|---------|
|                      |     |                             | X              | Y   | Z  |         |
| smokers > nonsmokers | R   | 359                         | 61             | -49 | 35 | 4.78    |
|                      | R   | 52                          | 45             | -37 | 56 | 3.98    |
| smokers < nonsmokers | R   | 133                         | 34             | 13  | -3 | 3.94    |
|                      | R   | 47                          | 6              | -10 | 9  | 3.97    |
|                      | R   | 64                          | 10             | 48  | 30 | 3.77    |

doi:10.1371/journal.pone.0102828.t002

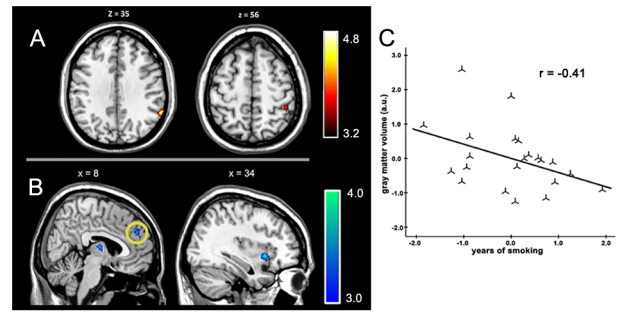

**Figure 1. The effect of chronic cigarette smoking on GMV.** Smokers showed higher GMV in the angular gyrus and inferior parietal lobule (A) and lower GMV in the insula, thalamus, and medial frontal cortex (B) compared with nonsmokers. GMV in the medial frontal cortex (B, region with yellow circle) was significantly negatively correlated with the history of smoking after controlling for age, education, and whole-brain volume (C). The results are shown with  $p < 0.05$  and corrected for multiple comparisons with the AlphaSim correction. doi:10.1371/journal.pone.0102828.g001

**VBM results**

The two-sample *t*-test ( $p < 0.05$  with the AlphaSim criterion) revealed significant differences between the GMVs of smokers and non-smokers. Smokers had significantly more GMV in the right angular gyrus ( $x, y, z = 62, -50, 35$ ;  $T$ -score = 4.78) and inferior parietal lobule ( $x, y, z = 45, -38, 56$ ;  $T$ -score = 3.98) compared with non-smokers. Smokers’ were found to have lower GMV in the right thalamus, right medial frontal gyrus, and right insula. The voxels of the peak GMV differences were in the right thalamus ( $x, y, z = 6, -11, 9$ ;  $T$ -score = 3.97), right medial frontal gyrus ( $x, y, z = 11, 48, 30$ ;  $T$ -score = 3.77), and right insula ( $x, y, z = 35, 14, -3$ ;  $T$ -score = 3.94) (for additional information, see Table 2 and Figure 1).

The exploratory correlation analysis between the GMVs of ROIs and smoking history showed a negative correlation between years of smoking and volume of the right medial frontal gyrus ( $r = -0.491, p = 0.02$ ). The correlation remained significant after controlling for age, education, and whole-brain volume ( $r = -0.413, p = 0.06$ ; Figure 1).

**GBC results**

The results of the two-sample *t*-test revealed higher GBC in smokers in the SOA condition than in nonsmokers in the insula ( $T$ -score = 4.79;  $x, y, z = -45, -18, 15$ ) and superior frontal gyrus ( $T$ -score = 4.70;  $x, y, z = -9, -6, 72$ ; Table 3 and Figure 2). The inclusion of age and education as covariates did not alter the results. The correlation analysis between the GBC of the insula and superior frontal gyrus and craving scores, which was measured by the QSU-brief, showed that craving scores were negatively correlated with the GBC of the superior frontal gyrus ( $r = -0.452, p = 0.05$ ) but was uncorrelated with the GBC of the insula ( $r = 0.041, p = 0.868$ ) in smokers in the SOA condition.

The paired *t*-test between smokers in the SOS and SOA conditions showed that the former had decreased GBC in the bilateral insula and regions of the DMN, which included the precuneus, bilateral angular gyrus, and bilateral inferior parietal lobule (Figure 3). The two-sample *t*-test between smokers in the SOS condition and nonsmokers demonstrated that GBC in the intrinsically organized DMN was lower for smokers in the SOS condition. The affected brain regions were the middle frontal cortex, precuneus, bilateral angular gyrus, and bilateral inferior

**Table 3.** Regions of higher global brain connectivity for smokers under the state of abstinence compared with nonsmokers.

| Regions                 | R/L | Number of Voxels in Cluster | MNI Coordinates x, y, z | T score |
|-------------------------|-----|-----------------------------|-------------------------|---------|
| Insula                  | L   | 45                          | -45, -18, 15            | 4.79    |
| Superior frontal cortex | L   | 70                          | -9, -6, 72              | 4.70    |

doi:10.1371/journal.pone.0102828.t003

parietal lobule (Table 4). After correcting for age and education, it still reached the significant level.

## Discussion

In the present study, we observed the structural changes among smokers in the insula, medial frontal gyrus, and several DMN regions, such as the angular gyrus and the inferior parietal lobule. In addition, under the SOA condition, smokers demonstrated higher GBC in the insula and superior frontal cortex. After acute cigarette smoking, however, smokers showed lower GBC in the DMN, including the middle frontal cortex, precuneus, bilateral angular gyrus, and bilateral inferior parietal lobule, which are a group of brain areas important in goal-directed cognitive performance [36]. These findings suggest that the structural changes in the DMN and the decreased global functional connectivity in the DMN of smokers after acute smoking might be involved in relapses.

Firstly, the present study showed that smokers demonstrated anatomical changes in the thalamus, medial frontal gyrus, and insula. These results are similar to those of previous studies that demonstrated brain structural changes caused by chronic cigarette smoking. Studies that performed VBM analyses have reported decreased GMV in the left thalamus and medial frontal cortex of smokers relative to those of control participants [4]. A lesion study

found that smokers with a damaged insula were more likely to quit smoking [7]. In addition, Angelica (2014) found that cigarette exposure, dependence and craving was negatively correlated with insula [37]. These findings suggested that the insula could be a critical neural substrate of addiction to smoking. The present study also provided evidence of structural changes in the insula of smokers. The reason for such structural changes in smokers may be that chronic cigarette smoking may damage microvessels and influence the blood supply to the brain [38]. Smoking may also damage the neurons of the brain and lead to neuronal necrosis. As a result, chronic cigarette smoking may lead to brain structural changes.

Moreover, our results demonstrated that smokers under the SOA condition showed higher GBC in the insula and superior frontal gyrus than non-smokers. According to previous studies, the insula has the highest density of nicotinic acetylcholine receptors [39] and is a key neural structure for representing the interoceptive effects of addiction [40]. It plays a role in enabling a subjective experience about the body's primary interoceptive and exteroceptive information and emotional feeling states [41]. In the present study, after 12 hours of abstinence, smokers showed a strong urge for smoking. Thus, the high GBC in the SOA condition might reflect that the smoker's primary interoceptive and exteroceptive information and emotional information were integrated and believed to generate conscious awareness of feeling

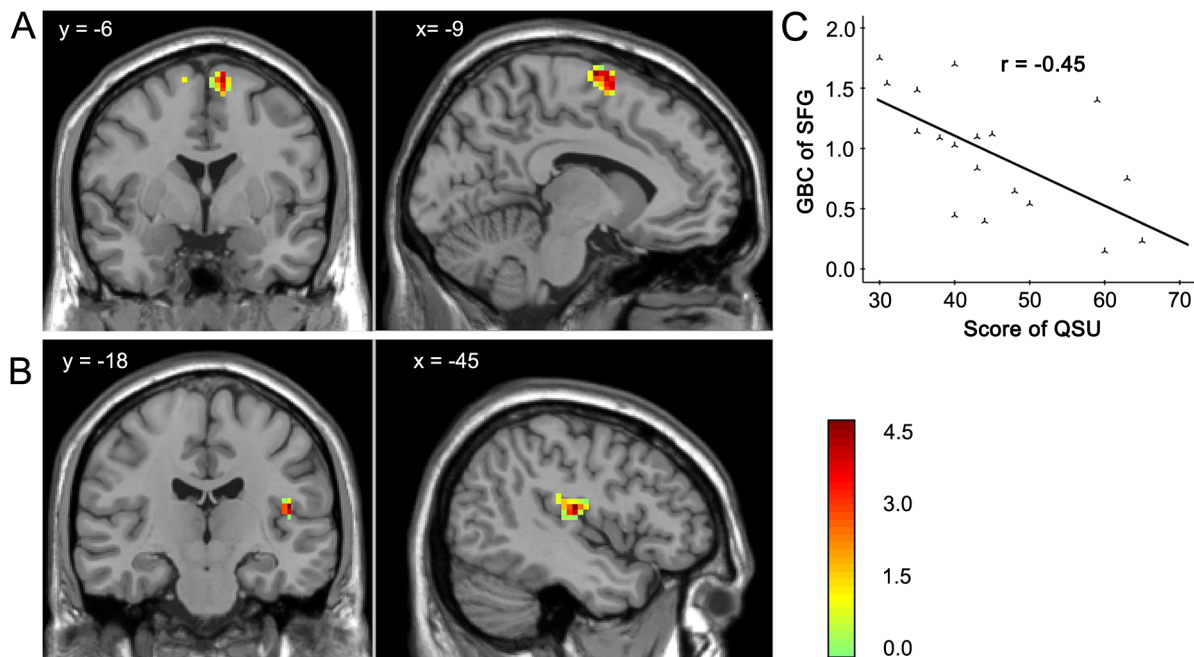

**Figure 2. Regions of higher GBC in smokers under the SOA condition.** Compared with that of nonsmokers, the GBC of smoker under the SOA condition was higher in the insula (A) and superior frontal gyrus (B). The GBC of the superior frontal gyrus was negatively correlated with the QUS-brief scores (C). The results are shown with  $p < 0.01$  and corrected for multiple comparisons with the AlphaSim correction.

doi:10.1371/journal.pone.0102828.g002

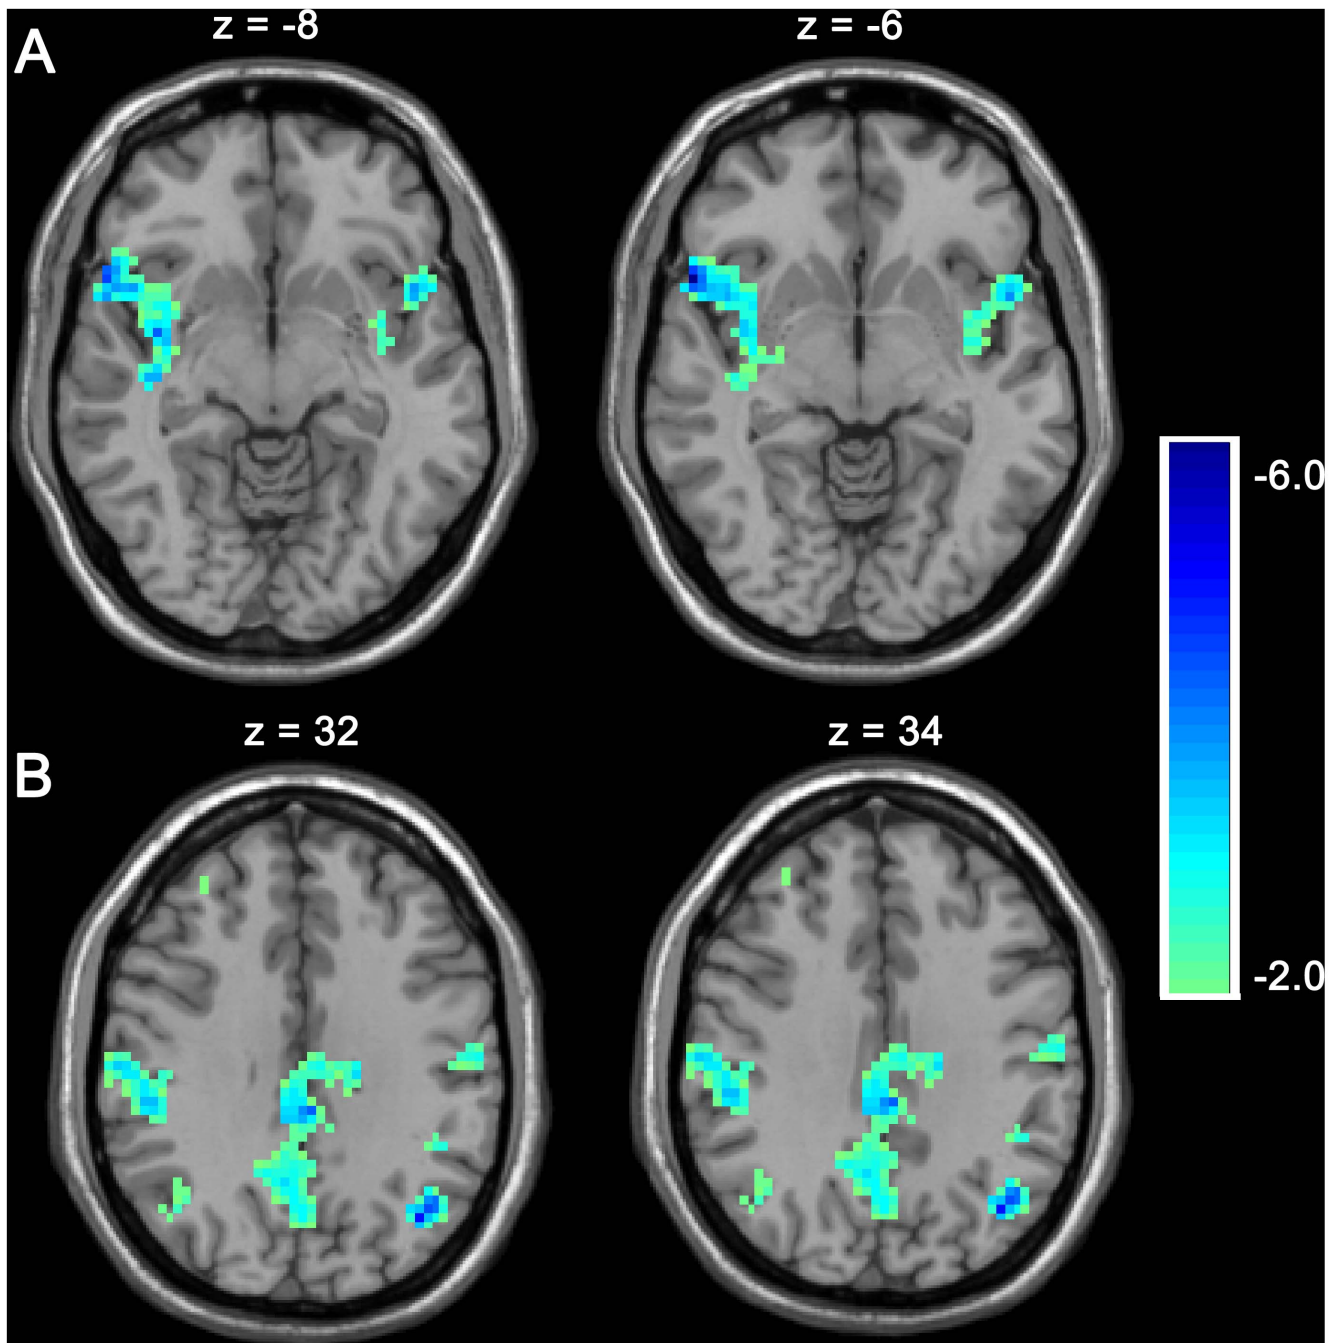

**Figure 3. Regions of decreased GBC in smokers after acute cigarette smoking.** Smokers showed decreased GBC in the bilateral insula (A) and regions of the DMN (B), including the middle frontal cortex, precuneus, bilateral angular gyrus, and bilateral inferior parietal lobule. The results are shown with  $p < 0.01$  and corrected for multiple comparisons with the AlphaSim correction. doi:10.1371/journal.pone.0102828.g003

states of craving. The prefrontal cortex is the most commonly reported loci of activation related to the pathogenesis of craving. A previous study using the rTMS method showed that the superior frontal gyrus had excitatory and inhibitory influences on cravings and the modulations of reactivity to cravings [42]. Moreover, a DTI study [43] implied that the superior frontal gyrus could be a major cortical “hub” with extensive interconnections, as identified in neuroimaging studies of cue-elicited cravings [44–46]. The present study found that craving scores were negatively correlated with the GBC of the superior frontal gyrus, and provided further

evidence of the role of the superior frontal gyrus in the inhibitory effect of cravings.

More interestingly, smokers under the SOS condition showed lower GBC in the middle frontal cortex, precuneus, bilateral angular gyrus, and bilateral inferior parietal lobule. This deactivated network overlaps the DMN. This finding is consistent with previous studies that demonstrated reduced BOLD-related activity in DMN regions after the administration of nicotine or nicotinic cholinergic agonists [19,21,47–49]. Previous studies have suggested that the degree of deactivation or suppression of the

**Table 4.** Regions of lower global brain connectivity for smokers under the state of satisfaction.

| Regions                  | R/L | Number of Voxels in Cluster | MNI coordinates x, y, z | T score |
|--------------------------|-----|-----------------------------|-------------------------|---------|
| Angular gyrus            | R   | 86                          | 45 -66 33               | 5.06    |
| Angular gyrus            | L   | 51                          | -48 -69 33              | 5.22    |
| Middle frontal cortex    | R   | 55                          | 42 27 39                | 4.12    |
| Inferior parietal lobule | R   | 98                          | 57 -42 33               | 6.38    |
| Inferior parietal lobule | L   | 56                          | -57 -45 39              | 4.15    |
| Precuneus                | R   | 77                          | 3 -57 39                | 3.96    |

doi:10.1371/journal.pone.0102828.t004

DMN is related to task demands [50]. This finding suggested a reallocation of resources away from the DMN toward the regions involved in task performance [21]. Many studies have also associated DMN deactivation with goal-directed cognitive processes, such as focused attention and working memory [51–55] and the enabling of systemizing and problem solving by insight [56]. Thus, the lower GBC in the DMN after acute cigarette smoking observed in the present study could contribute to smokers' decreased negative attentional bias and increase of good performance in some cognitive behaviors. Indeed, well-documented studies have demonstrated that smoking could enhance the performance of cognitive behaviors, including attention, information processing, and memory [57].

Moreover, our results demonstrate that GMV-based regions of structural change partially overlapped with the GBC results. However, the relationship between structure and function remains unclear [58]. The most obvious explanation is that the structural changes caused by chronic cigarette smoking could lead to functional abnormalities, as demonstrated by the structural changes in the insula and frontal gyrus that led to higher GBCs of smokers in the SOA condition. This result was in line with a previous study of the influence of structural changes on brain function [58,59]. For instance, callosal agenesis decreases the inter-hemispheric functional connectivity during the resting state [60,61]. In major depressive disorders, structural abnormalities of the uncinate fasciculus are associated with increased functional connectivity between the subgenual anterior cingulate cortex and the medial temporal lobe, which are concomitant with the severity of depressive symptoms. Our study provided additional evidence for this structure–function relationship. For the DMN, structural changes and decreased GBC after acute cigarette smoking were found in our results. They might be involved in the relapse of smokers. Structural changes caused by chronic cigarette smoking can lead to brain functional abnormalities and poor performance in cognitive behaviors [62]. It was necessary to arouse cortical arousal and change brain functions if smokers want to enhance performance in some cognitive behaviors. Only by acute cigarette smoking or injecting nicotine can smokers reduce negative

attentional bias and increase cortical arousal though the neurochemically ascending cholinergic and noradrenergic projection of nicotine [4,18,40,63–65]. Cortical arousal may also involve neuronal activation through nicotinic cholinergic receptors [22] or through the modulation of glutamate or GABA, dopamine neurotransmission, or MAO inhibitors [22,62]. After nicotine administration, smokers could improve the performance in some cognitive behaviors, such as attention [18] and memory tasks [10].

One limitation of this study is that smoker and nonsmoker participants were treated differently: the smoker group was exposed to cigarettes whereas the nonsmoker group were not. The observed differences in smokers after acute cigarette smoking could therefore have been caused by psychological factors rather than the cigarettes. Thus, further research which could involve exposing nonsmoker groups to cigarettes or placebos is needed to confirm our results. Moreover, the verification of the SOA condition was based on a self-report rather than a confirmatory biological measure (e.g., breath carbon monoxide level). Furthermore, we were unable to determine the effect of acute cigarette smoking on different lengths of abstinence.

In conclusion, a novel GBC method was applied to investigate the influence of acute cigarette smoking on brain functions. The results indicated that GBC was higher in the insula and superior frontal gyrus in smokers under the SOA condition. Critically, lower GBC in the DMN was observed after acute cigarette smoking, which is associated with goal-directed cognitive performance. Furthermore, brain regions with structural changes partially overlapped with the affected hubs. In sum, this study may help elucidate the DMN regions that play an important role in smokers relapsing after a short period of time.

### Author Contributions

Conceived and designed the experiments: KW JY SZ DW JQ. Performed the experiments: KW SZ XH. Analyzed the data: KW JY DW. Contributed reagents/materials/analysis tools: KW SZ ST JQ. Wrote the paper: KW JY DW JQ.

### References

- Warner K, MacKay J (2006) The global tobacco disease pandemic: nature, causes, and cures. *Global public health* 1: 65–86.
- Yang G, Kong L, Zhao W, Wan X, Zhai Y, et al. (2008) Emergence of chronic non-communicable diseases in China. *The Lancet* 372: 1697–1705.
- West R, Shiffman S (2007) *Fast facts: smoking cessation*: Health Press Limited.
- Liao Y, Tang J, Liu T, Chen X, Hao W (2010) Differences between smokers and non-smokers in regional gray matter volumes: a voxel-based morphometry study. *Addiction Biology*.
- Brody AL, Mandelkern MA, Jarvik ME, Lee GS, Smith EC, et al. (2004) Differences between smokers and nonsmokers in regional gray matter volumes and densities. *Biological psychiatry* 55: 77–84.
- Gallinat J, Meisenzahl E, Jacobsen LK, Kalus P, Bierbrauer J, et al. (2006) Smoking and structural brain deficits: a volumetric MR investigation. *European Journal of Neuroscience* 24: 1744–1750.
- Naqvi NH, Rudrauf D, Damasio H, Bechara A (2007) Damage to the insula disrupts addiction to cigarette smoking. *Science* 315: 531–534.
- Liao Y, Tang J, Deng Q, Deng Y, Luo T, et al. (2011) Bilateral fronto-parietal integrity in young chronic cigarette smokers: A diffusion tensor imaging study. *PLoS one* 6: e26460.
- Yu R, Zhao L, Lu L (2011) Regional Grey and White Matter Changes in Heavy Male Smokers. *PLoS one* 6: e27440.

10. Ernst M, Matochik JA, Heishman SJ, Van Horn JD, Jons PH, et al. (2001) Effect of nicotine on brain activation during performance of a working memory task. *Proceedings of the National Academy of Sciences* 98: 4728–4733.
11. Xu J, Mendrek A, Cohen MS, Monterosso J, Rodriguez P, et al. (2005) Brain activity in cigarette smokers performing a working memory task: effect of smoking abstinence. *Biological psychiatry* 58: 143.
12. Luo S, Ainslie G, Giragosian L, Monterosso JR (2011) Striatal hyposensitivity to delayed rewards among cigarette smokers. *Drug and alcohol dependence* 116: 18–23.
13. Azizian A, Nestor IJ, Payer D, Monterosso JR, Brody AL, et al. (2009) Smoking reduces conflict-related anterior cingulate activity in abstinent cigarette smokers performing a Stroop task. *Neuropsychopharmacology* 35: 775–782.
14. Gons RA, van Norden AG, de Laat KF, van Oudheusden LJ, van Uden IW, et al. (2011) Cigarette smoking is associated with reduced microstructural integrity of cerebral white matter. *Brain* 134: 2116–2124.
15. Hudkins M, O'Neill J, Tobias MC, Bartzokis G, London ED (2012) Cigarette smoking and white matter microstructure. *Psychopharmacology*: 1–11.
16. Pan P, Shi H, Zhong J, Xiao P, Shen Y, et al. (2012) Chronic smoking and brain gray matter changes: evidence from meta-analysis of voxel-based morphometry studies. *Neurological Sciences*: 1–5.
17. Stein EA, Pankiewicz J, Harsch HH, Cho J-K, Fuller SA, et al. (1998) Nicotine-induced limbic cortical activation in the human brain: a functional MRI study. *American Journal of Psychiatry* 155: 1009–1015.
18. Lawrence NS, Ross TJ, Stein EA (2002) Cognitive mechanisms of nicotine on visual attention. *Neuron* 36: 539.
19. Hahn B, Ross TJ, Yang Y, Kim I, Huestis MA, et al. (2007) Nicotine enhances visuospatial attention by deactivating areas of the resting brain default network. *The Journal of Neuroscience* 27: 3477–3489.
20. Cole DM, Beckmann CF, Long CJ, Matthews PM, Durcan MJ, et al. (2010) Nicotine replacement in abstinent smokers improves cognitive withdrawal symptoms with modulation of resting brain network dynamics. *Neuroimage* 52: 590–599.
21. Tanabe J, Nyberg E, Martin LF, Martin J, Cordes D, et al. (2011) Nicotine effects on default mode network during resting state. *Psychopharmacology* 216: 287–295.
22. Poorthuis RB, Goriounova NA, Couey JJ, Mansvelter HD (2009) Nicotinic actions on neuronal networks for cognition: general principles and long-term consequences. *Biochemical pharmacology* 78: 668–676.
23. Raichle ME, Snyder AZ (2007) A default mode of brain function: a brief history of an evolving idea. *Neuroimage* 37: 1083–1090.
24. Fox MD, Raichle ME (2007) Spontaneous fluctuations in brain activity observed with functional magnetic resonance imaging. *Nature Reviews Neuroscience* 8: 700–711.
25. Yu R, Zhao L, Tian J, Qin W, Wang W, et al. (2011) Regional homogeneity changes in heavy male smokers: a resting-state functional magnetic resonance imaging study. *Addiction Biology* 18 729–731.
26. West R, Ussher M (2010) Is the ten-item Questionnaire of Smoking Urges (QSU-brief) more sensitive to abstinence than shorter craving measures? *Psychopharmacology* 208: 427–432.
27. Cox LS, Tiffany ST, Christen AG (2001) Evaluation of the brief questionnaire of smoking urges (QSU-brief) in laboratory and clinical settings. *Nicotine & Tobacco Research* 3: 7–16.
28. Ashburner J, Friston KJ (2000) Voxel-based morphometry—the methods. *Neuroimage* 11: 805–821.
29. Takeuchi H, Taki Y, Sassa Y, Hashizume H, Sekiguchi A, et al. (2012) Brain structures associated with executive functions during everyday events in a non-clinical sample. *Brain Structure and Function* 218: 1–16.
30. Takeuchi H, Taki Y, Nouchi R, Sekiguchi A, Kotozaki Y, et al. (2012) Regional gray matter density is associated with achievement motivation: evidence from voxel-based morphometry. *Brain Structure and Function* 219: 1–13.
31. Buckner RL, Sepulcre J, Talukdar T, Krienen FM, Liu H, et al. (2009) Cortical hubs revealed by intrinsic functional connectivity: mapping, assessment of stability, and relation to Alzheimer's disease. *The Journal of Neuroscience* 29: 1860–1873.
32. Tomasi D, Volkow ND (2010) Functional connectivity density mapping. *Proceedings of the National Academy of Sciences* 107: 9885–9890.
33. Tomasi D, Volkow ND (2012) Gender differences in brain functional connectivity density. *Human brain mapping* 33: 849–860.
34. Tomasi D, Volkow ND (2011) Association between functional connectivity hubs and brain networks. *Cerebral Cortex* 21: 2003–2013.
35. Wood D, Mould M, Ong S, Baker E (2005) “Pack year” smoking histories: what about patients who use loose tobacco? *Tobacco control* 14: 141–142.
36. Duan X, He S, Liao W, Liang D, Qiu L, et al. (2012) Reduced caudate volume and enhanced striatal-DMN integration in chess experts. *Neuroimage* 60: 1280–1286.
37. Morales AM, Ghahremani D, Kohno M, Helleman GS, London ED (2014) Cigarette Exposure, Dependence, and Craving Are Related to Insula Thickness in Young Adult Smokers. *Neuropsychopharmacology* 39: 1816–1822.
38. Durazzo TC, Gazdzinski S, Meyerhoff DJ (2007) The neurobiological and neurocognitive consequences of chronic cigarette smoking in alcohol use disorders. *Alcohol and alcoholism* 42: 174–185.
39. Picard F, Sadaghiani S, Leroy C, Courvoisier DS, Maroy R, et al. (2013) High density of nicotinic receptors in the cingulo-insular network. *Neuroimage* 79: 42–51.
40. Naqvi NH, Bechara A (2009) The hidden island of addiction: the insula. *Trends in neurosciences* 32: 56–67.
41. Singer T, Critchley HD, Preusschoff K (2009) A common role of insula in feelings, empathy and uncertainty. *Trends in cognitive sciences* 13: 334–340.
42. Rose JE, McClernon FJ, Froeliger B, Behm FM, Preud'homme X, et al. (2011) Repetitive transcranial magnetic stimulation of the superior frontal gyrus modulates craving for cigarettes. *Biological psychiatry* 70: 794–799.
43. Gong G, He Y, Concha L, Lebel C, Gross DW, et al. (2009) Mapping anatomical connectivity patterns of human cerebral cortex using in vivo diffusion tensor imaging tractography. *Cerebral Cortex* 19: 524–536.
44. Taylor KS, Seminowicz DA, Davis KD (2009) Two systems of resting state connectivity between the insula and cingulate cortex. *Human brain mapping* 30: 2731–2745.
45. Brody AL, Mandelkern MA, London ED, Childress AR, Lee GS, et al. (2002) Brain metabolic changes during cigarette craving. *Archives of general psychiatry* 59: 1162.
46. Lee J-H, Lim Y, Wiederhold BK, Graham SJ (2005) A functional magnetic resonance imaging (fMRI) study of cue-induced smoking craving in virtual environments. *Applied psychophysiology and biofeedback* 30: 195–204.
47. Thiel CM, Zilles K, Fink GR (2005) Nicotine modulates reorienting of visuospatial attention and neural activity in human parietal cortex. *Neuropsychopharmacology* 30: 810–820.
48. Thiel C, Fink G (2008) Effects of the cholinergic agonist nicotine on reorienting of visual spatial attention and top-down attentional control. *Neuroscience* 152: 381–390.
49. Jasinska AJ, Zorick T, Brody AL, Stein EA (2013) Dual role of nicotine in addiction and cognition: a review of neuroimaging studies in humans. *Neuropharmacology* 84 111–122.
50. Meekieman KA, Kaufman JN, Kucera-Thompson J, Binder JR (2003) A parametric manipulation of factors affecting task-induced deactivation in functional neuroimaging. *Journal of Cognitive Neuroscience* 15: 394–408.
51. Whitfield-Gabrieli S, Ford JM (2012) Default mode network activity and connectivity in psychopathology. *Annual Review of Clinical Psychology* 8: 49–76.
52. Anticevic A, Repovs G, Shulman GL, Barch DM (2010) When less is more: TPJ and default network deactivation during encoding predicts working memory performance. *Neuroimage* 49: 2638–2648.
53. Daselaar S, Prince S, Cabeza R (2004) When less means more: deactivations during encoding that predict subsequent memory. *Neuroimage* 23: 921–927.
54. Weissman D, Roberts K, Visser K, Woldorff M (2006) The neural bases of momentary lapses in attention. *Nature neuroscience* 9: 971–978.
55. Anticevic A, Cole MW, Murray JD, Corlett PR, Wang X-J, et al. (2012) The role of default network deactivation in cognition and disease. *Trends in cognitive sciences* 16: 584–592.
56. Fields C (2011) From “Oh, OK” to “Ah, yes” to “Aha!”: Hyper-systemizing and the rewards of insight. *Personality and Individual Differences* 50: 1159–1167.
57. Heishman SJ, Kleykamp BA, Singleton EG (2010) Meta-analysis of the acute effects of nicotine and smoking on human performance. *Psychopharmacology* 210: 453–469.
58. Kwaastniet Bd, Ruhe E, Caan M, Rive M, Olabarriaga S, et al. (2013) Relation Between Structural and Functional Connectivity in Major Depressive Disorder. *Biological psychiatry* 74: 40–47.
59. Steffens DC, Taylor WD, Denny KL, Bergman SR, Wang L (2011) Structural integrity of the uncinate fasciculus and resting state functional connectivity of the ventral prefrontal cortex in late life depression. *PLoS one* 6: e22697.
60. Quigley M, Cordes D, Turski P, Moritz C, Haughton V, et al. (2003) Role of the corpus callosum in functional connectivity. *American journal of neuroradiology* 24: 208–212.
61. Johnston JM, Vaishnavi SN, Smyth MD, Zhang D, He BJ, et al. (2008) Loss of resting interhemispheric functional connectivity after complete section of the corpus callosum. *The Journal of Neuroscience* 28: 6453–6458.
62. Swan GE, Lessov-Schlaggar CN (2007) The effects of tobacco smoke and nicotine on cognition and the brain. *Neuropsychology review* 17: 259–273.
63. Rose JE, Behm FM, Westman EC, Mathew RJ, London ED, et al. (2003) PET studies of the influences of nicotine on neural systems in cigarette smokers. *American Journal of Psychiatry* 160: 323–333.
64. Xu J, Mendrek A, Cohen MS, Monterosso J, Simon S, et al. (2006) Effect of cigarette smoking on prefrontal cortical function in nondependent smokers performing the Stroop Task. *Neuropsychopharmacology* 32: 1421–1428.
65. Miller LR, Mukherjee S, Ansah TA, Das SK (2007) Cigarette smoke and dopaminergic system. *Journal of biochemical and molecular toxicology* 21: 325–335.
